# Supplementary material for: A Deeper Insight in Metal Binding to the hCtr1 N-terminus Fragment: Affinity, Speciation and Binding Mode of Binuclear Cu2+ and Mononuclear Ag+ Complex Species
Source: MDPI journal article supplement (doi:10.3390/ijms23062929), 2022-03-08
Supplement: s1 [file s1]

# A deeper insight in metal binding to the hCtr1 N-terminus fragment: affinity, speciation and binding mode of binuclear $\text{Cu}^{2+}$ and mononuclear $\text{Ag}^+$ complex species

Antonio Magri<sup>1,#</sup>, Giovanni Tabbi<sup>1,#</sup>, Irina Naletova<sup>1,2</sup>, Francesco Attanasio<sup>1,\*</sup>, Giuseppe Arena<sup>3</sup> and Enrico Rizzarelli<sup>1,2,3,\*</sup>

<sup>1</sup> Institute of Crystallography, National Council of Research, CNR, S.S. Catania, via P. Gaifami 18, Catania, Italy; antonio.magri@ic.cnr.it, giovanni.tabbi@ic.cnr.it, irina.naletova@ic.cnr.it, francesco.attanasio@ic.cnr.it

<sup>2</sup> Consorzio Interuniversitario per la Ricerca dei Metalli nei Sistemi Biologici, Via Ulpiani 27, Bari, Italy;

<sup>3</sup> Department of Chemical Sciences, University of Catania, Viale A. Doria 6, Catania, Italy; garena@unict.it

# AM and GT share the first authorship

\* Correspondence: erizzarelli@unict.it; Tel.: +39 095 7385070 (E.R.); francesco.attanasio@ic.cnr.it (F.A.)

**Table S1.** Log  $\beta$  and pK values for the protonation of the Ctr1<sub>(1-14)</sub>.

| Species<br>[L <sub>q</sub> H <sub>r</sub> ] | log $\beta^{a,b}$ | pK <sup>b</sup> | log $\beta^c$ | pK <sup>c</sup> |
|---------------------------------------------|-------------------|-----------------|---------------|-----------------|
| qr                                          |                   |                 |               |                 |
| 11                                          | 9.64 (3)          | 9.64            | 9.84          | 9.84            |
| 12                                          | 17.27 (2)         | 7.63            | 17.30         | 7.46            |
| 13                                          | 24.18 (2)         | 6.91            | 24.23         | 6.93            |
| 14                                          | 30.47 (1)         | 6.29            | 30.46         | 6.23            |
| 15                                          | 36.21 (2)         | 5.74            | 36.24         | 5.78            |
| 16                                          | 40.39 (3)         | 4.17            | 40.27         | 4.03            |
| 17                                          | 43.21 (1)         | 2.82            | 43.20         | 2.92            |

<sup>a</sup>3 $\sigma$  in parentheses; <sup>b</sup>This work; <sup>c</sup>Reference 17
